# Supplementary material
Source: PubMed Central journal article supplement (PMC4504233)
Supplement: NIHMS700619-supplement-Supplemental_tables.pdf [file NIHMS700619-supplement-Supplemental_tables.pdf]

1 **Supplemental Online Material**

2

3 **eTable 1. Characteristics of patients with non-elective admissions for diverticulitis by UV quartile**

4 **eTable 2. Rate of non-elective admission for diverticulitis, by UV quartile and subgroup**

5 **eTable 3: Rate of non-elective hospitalization for diverticulitis in summer (third quarter) versus winter (first quarter)**

6

7

8

9

**eTable 1.Characteristics of patients with non-elective admissions for diverticulitis by UV quartile**

| Analyte           | Quartile <sup>a</sup> |         |      |         |      |         |      |         |
|-------------------|-----------------------|---------|------|---------|------|---------|------|---------|
|                   | UV1                   |         | UV2  |         | UV3  |         | UV4  |         |
|                   | N <sup>b</sup>        | Percent | N    | Percent | N    | Percent | N    | Percent |
| Overall           | 8.04                  |         | 8.07 |         | 8.10 |         | 8.16 |         |
| Sex               |                       |         |      |         |      |         |      |         |
| Female            | 4.91                  | 61.1%   | 4.96 | 61.5%   | 4.97 | 61.3%   | 4.98 | 61.0%   |
| Male              | 3.12                  | 38.8%   | 3.10 | 38.4%   | 3.13 | 38.6%   | 3.17 | 38.9%   |
| Race              |                       |         |      |         |      |         |      |         |
| White             | 4.14                  | 51.5%   | 4.14 | 51.3%   | 4.21 | 51.9%   | 4.27 | 52.3%   |
| Black             | 0.80                  | 9.9%    | 0.80 | 10.0%   | 0.79 | 9.8%    | 0.79 | 9.7%    |
| Not Reported      | 2.15                  | 26.7%   | 2.16 | 26.7%   | 2.17 | 26.8%   | 2.18 | 26.8%   |
| Age               |                       |         |      |         |      |         |      |         |
| ≥ 60 years        | 3.90                  | 48.6%   | 3.79 | 47.0%   | 3.93 | 48.5%   | 4.08 | 50.0%   |
| < 60 years        | 4.13                  | 51.4%   | 4.28 | 53.0%   | 4.17 | 51.5%   | 4.08 | 50.0%   |
| Hospital Location |                       |         |      |         |      |         |      |         |
| Rural             | 1.14                  | 14.2%   | 1.14 | 14.1%   | 1.15 | 14.2%   | 1.19 | 14.6%   |
| Urban             | 6.89                  | 85.7%   | 6.92 | 85.7%   | 6.94 | 85.7%   | 6.96 | 85.3%   |

<sup>a</sup>Quartiles of UV irradiance, UV1 – lowest UV exposure quartile, UV4 –highest UV exposure quartile<sup>b</sup>In millions of admissions

10

11

12

13

14  
15

**eTable 2. Rate of non-elective admission for diverticulitis, by UV quartile and subgroup**

|                          | Rate of admission, all quartiles <sup>a</sup> | Rate of admission, UV1 | Rate of admission, UV4 | p-value <sup>b</sup> | Difference in rate, UV1-UV4 | p-heterogeneity <sup>c</sup> |
|--------------------------|-----------------------------------------------|------------------------|------------------------|----------------------|-----------------------------|------------------------------|
| <b>Overall</b>           | 696.9 (72.7)                                  | 751.8 (66.7)           | 668.1 (36.9)           | <0.0001              | 83.7 (43.3)                 |                              |
| <b>Gender</b>            |                                               |                        |                        |                      |                             |                              |
| Men                      | 709.4 (75.1)                                  | 766.7 (75.2)           | 696.1 (42.7)           | 0.0008               | 70.6 (59.5)                 |                              |
| Women                    | 689.7 (80.2)                                  | 742.2 (65.2)           | 651.0 (36.7)           | <0.0001              | 91.2 (41.6)                 | 0.2114                       |
| <b>Race</b>              |                                               |                        |                        |                      |                             |                              |
| White                    | 809.56 (102.3)                                | 883.0 (90.5)           | 795.0 (46.8)           | 0.0004               | 88.0 (64.9)                 |                              |
| Black                    | 428.2 (64.6)                                  | 451.7 (60.4)           | 398.6 (41.6)           | 0.0025               | 53.1 (66.6)                 | 0.101                        |
| <b>Age</b>               |                                               |                        |                        |                      |                             |                              |
| ≥ 60 years               | 883.2 (83.4)                                  | 899.8 (90.6)           | 863.2 (58.2)           | 0.137                | 36.6 (59.4)                 |                              |
| < 60 years               | 522.3 (82.9)                                  | 604.3 (56.0)           | 495.2 (39.1)           | <0.0001              | 109.1 (39.2)                | <0.0001                      |
| <b>Hospital Location</b> |                                               |                        |                        |                      |                             |                              |
| Urban                    | 644.1 (92.8)                                  | 707.3 (66.6)           | 646.0 (37.9)           | 0.001                | 59.6 (91.4)                 |                              |
| Rural                    | 929.7 (119.5)                                 | 946.5 (92.1)           | 886.8 (96.0)           | 0.0521               | 61.2 (43.6)                 | 0.94                         |

Abbreviations: UV4 – highest UV exposure quartile, UV-1 – lowest UV exposure quartile

<sup>a</sup>Rate of non-elective admission for diverticulitis per 100,000 total adult admissions. Values are mean (standard deviation).

<sup>b</sup>p-value compares rate in UV1 to rate in UV4 <sup>c</sup>p-heterogeneity compares the difference in rates in UV1 and UV4 between each subgroup

16  
17  
18  
19  
20  
21  
22  
23  
24

25  
26

**eTable 3: Rate of non-elective hospitalization for diverticulitis in summer (third quarter) versus winter (first quarter)**

| Group              | Rate of admission, First Quarter <sup>a</sup> | Rate of admission, Third Quarter | p-value <sup>b</sup> | % Change | p-heterogeneity    |
|--------------------|-----------------------------------------------|----------------------------------|----------------------|----------|--------------------|
| <b>All</b>         | 645.3 (54.1)                                  | 748.4 (70.6)                     | <.0001               | 16.0%    |                    |
| <b>Gender</b>      |                                               |                                  |                      |          |                    |
| Male               | 664.2 (59.3)                                  | 757.2 (80.3)                     | <.0001               | 14.0%    |                    |
| Female             | 633.9 (57.6)                                  | 744.1 (74.5)                     | <.0001               | 17.4%    | 0.193              |
| <b>Race</b>        |                                               |                                  |                      |          |                    |
| Black              | 401.3 (39.3)                                  | 443.7 (79.6)                     | 0.02                 | 10.6%    | <0.0001            |
| White              | 743.5 (78.8)                                  | 876.7 (100.6)                    | <.0001               | 17.9%    |                    |
| <b>Age</b>         |                                               |                                  |                      |          |                    |
| < 60 years         | 486.2 (76.5)                                  | 551.0 (90.4)                     | 0.0087               | 13.3%    | <0.0001            |
| ≥ 60 years         | 804.7 (48.1)                                  | 971.1 (62.6)                     | <.0001               | 20.7%    |                    |
| <b>Location</b>    |                                               |                                  |                      |          |                    |
| Rural              | 853.7 (77.7)                                  | 1017.1 (103.6)                   | <.0001               | 19.1%    | 0.0008             |
| Urban              | 593.7 (16.7)                                  | 691.8 (17.2)                     | 0.0002               | 16.5%    |                    |
| <b>UV Quartile</b> |                                               |                                  |                      |          |                    |
| UV1                | 693.2 (54.8)                                  | 813.9 (68.1)                     | 0.0150               | 17.4%    | 0.01 <sup>d</sup>  |
| UV2                | 685.6 (34.3)                                  | 795.6 (42.6)                     | 0.0020               | 16.0%    | 0.02 <sup>d</sup>  |
| UV3                | 596.8 (16.6)                                  | 695.7 (26.8)                     | 0.0001               | 16.6%    | 0.131 <sup>d</sup> |
| UV4                | 625.4 (35.1)                                  | 695.8 (21.0)                     | 0.0049               | 11.2%    |                    |

Abbreviations: OR – odds ratio, CI – confidence interval, UV4 – highest UV quartile, UV3, UV2 – intermediate quartiles, UV-1 – lowest UV exposure quartile

<sup>a</sup>Rate of non-elective admission for diverticulitis per 100,000 total adult admissions. Values are mean (standard deviation).

<sup>b</sup>p-value compares Rate<sup>First Quarter</sup> to Rate<sup>Third Quarter</sup>

<sup>c</sup>Multivariate OR of admission of diverticulitis comparing subgroups includes age, gender, race, hospital location, quartiles of UV exposure, and admission year.

<sup>d</sup>p-value compares (Rate<sup>Third Quarter</sup> - Rate<sup>First Quarter</sup>) between UV1 and specified UV quartile

27  
28  
29  
30  
31
